# Supplementary material
Source: PubMed Central journal article supplement (PMC5733581)
Supplement: 10.1074_M117.814186_jbc.M117.814186-1.pdf [file 10.1074_M117.814186_jbc.M117.814186-1.pdf]

**Supplementary Information**  
**Substrate-induced conformational changes in the nucleotide-binding domains**  
**of lipid bilayer-associated P-glycoprotein during ATP hydrolysis**

Maria E. Zoghbi<sup>#1</sup>, Leo Mok<sup>#2</sup>, Douglas J. Swartz<sup>2</sup>, Anukriti Singh<sup>2</sup>, Gregory A. Fendley<sup>1</sup>, Ina L. Urbatsch<sup>2,3</sup> and Guillermo A. Altenberg<sup>1,3</sup>

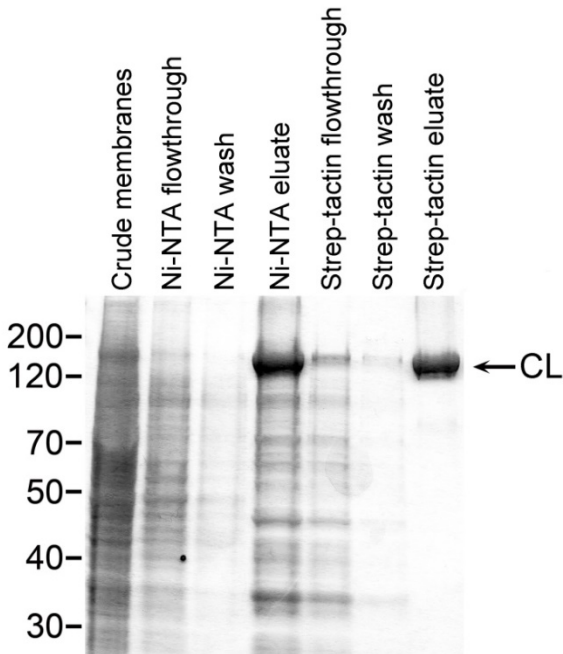

Supplementary Fig. 1. **Example of Pgp purification.** Samples were subjected to SDS-PAGE and the gel was stained with Coomassie blue. The example corresponds to the purification of Cys-less Pgp (CL), but the results were essentially identical for WT Pgp, NT Pgp and NT/AA Pgp. Molecular masses of selected markers, in kDa, are shown on the left. See main text for details.

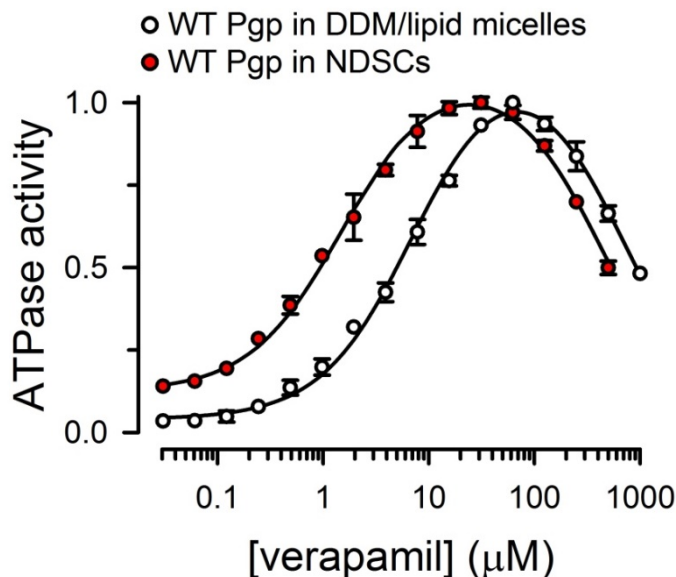

Supplementary Fig. 2. **Verapamil (Ver)-stimulated ATPase activity of WT Pgp.** WT Pgp activity was assayed at 37°C in the presence of 10 mM ATP and 12 mM MgSO<sub>4</sub> in 0.1% DDM supplemented with 0.6% (w/v) *E. coli* lipids (WT Pgp in DDM/lipid micelles) and in NDSCs. Data are means ± SD (n = 3 for each condition). SDs smaller than the symbols are not shown). Activities were normalized to maximal measured rates (5.0 ± 0.1 μmol/min/mg for Pgp for detergent/lipid micelles and 5.2 ± 0.1 μmol/min/mg for Pgp in NDSCs). Lines represent fits to the equation:

$$V = V_b + ((V_{max} - V_b) \cdot Ver / (K_S + Ver)) \cdot (1 - (V_{max} - V_F) / (V_{max} - V_b) \cdot (Ver / K_I + Ver))$$

V: rate of ATP hydrolysis; V<sub>b</sub>: basal

ATPase activity; V<sub>max</sub>: maximal ATPase activity; Ver: verapamil concentration; K<sub>S</sub>: EC<sub>50</sub> for the stimulatory effect; V<sub>F</sub>: ATPase activity at ∞ Ver; K<sub>I</sub>: IC<sub>50</sub> for the inhibitory effect. The average K<sub>S</sub> values for Pgp in NDSCs and micelles were 1.5 and 7.3 μM, respectively.

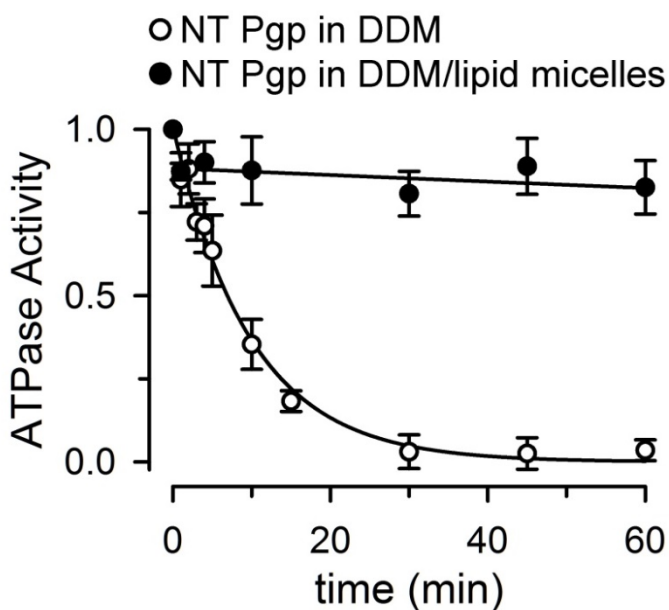

Supplementary Fig. 3. **Stability of the Pgp-NT ATPase.** Activities of Pgp NT in 0.1% n-dodecyl- $\beta$ -D-maltopyranoside (DDM) in the absence of lipids (Pgp-NT in DDM) and after supplementation with 0.6% (w/v) *E. coli* lipids (Pgp-NT in DDM/lipid micelles). The ATPase activity was measured at 37°C and data are means  $\pm$  SD (n = 3 for each condition).

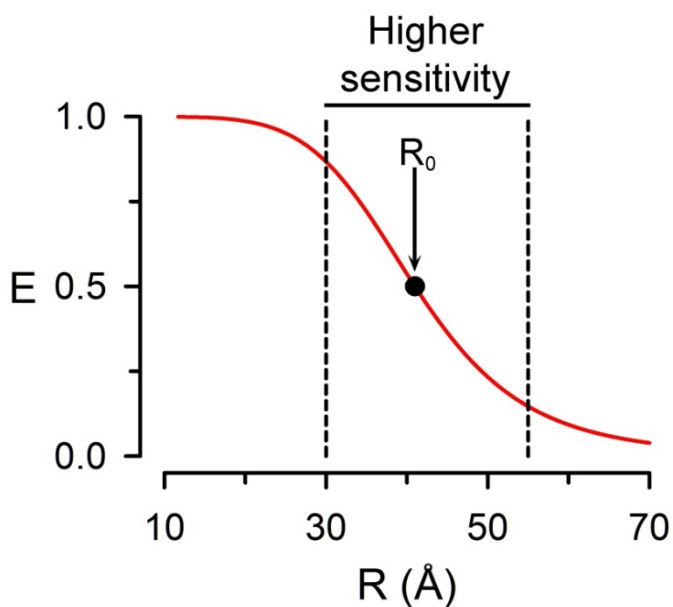

Supplementary Fig. 4. **Dependence of energy transfer (E) on Tb<sup>3+</sup>-Bodipy FL distance.** The curve was generated from:  $R = R_0 (E^{-1}-1)^{1/6}$ , where R is the donor-acceptor distance and R<sub>0</sub> is the Förster distance (the distance at which E = 0.5). The R<sub>0</sub> determined for the Tb<sup>3+</sup>/Bodipy Fl pair was 41 Å.

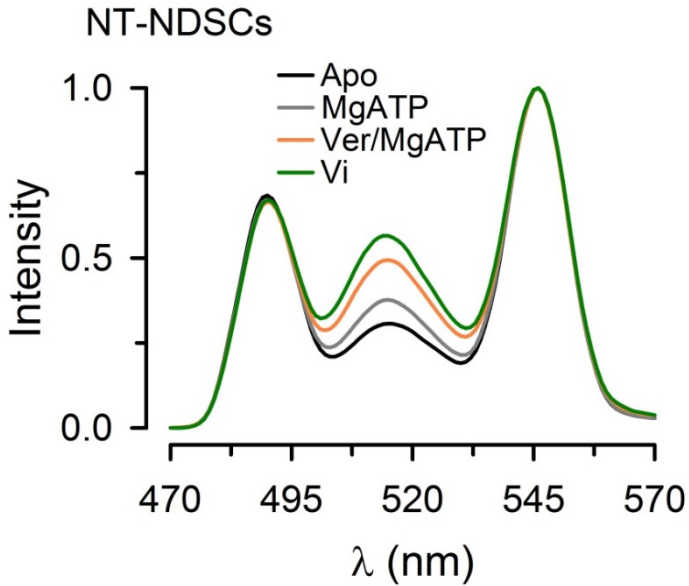

Supplementary Fig. 5. **Increase in sensitized Bodipy FL emission during hydrolysis by addition of verapamil.** Emission spectra from NDSCs containing Pgp NT labeled with donor ( $Tb^{3+}$  chelate) and acceptor (Bodipy FL). Traces obtained sequentially at  $37^{\circ}C$  were normalized to the  $Tb^{3+}$  emission at 546 nm and are representative of at least 3 independent experiments. Emission was recorded after a 200  $\mu s$  delay from the 337-nm excitation pulse. Apo: nucleotide- and drug-free buffer with 1 mM EDTA; MgATP: + 5 mM MgATP; Ver/MgATP: + 30  $\mu M$  verapamil; Ver/Vi: + 0.25 mM Vi.

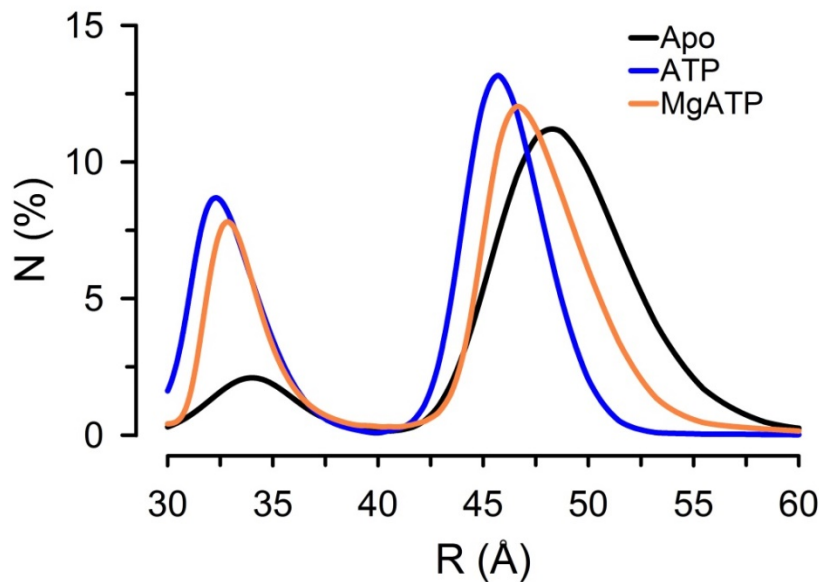

Supplementary Fig. 6. **Distance distributions of Pgp NT in NDSCs in the absence of transport substrate.** Distance distributions calculated from LRET sensitized emission intensity decays analyzed by an exponential series method. N: % molecules. The percentage of molecules in each conformation was adjusted based on the cumulative number of molecules vs. donor-acceptor pair distance obtained from the exponential series method analysis. See Experimental Procedures and Supplementary Fig. 8 for details. Data correspond to the best fits

obtained using Peak Fit (Systat Software Inc., San Jose, CA) using data from 7 independent experiments. Apo: nucleotide- and drug-free buffer with 1 mM EDTA; ATP: + 5 mM NaATP; MgATP: + 10 mM  $MgSO_4$ . Data from Pgp-NT in NDs at  $37^{\circ}C$  were used for all calculations.

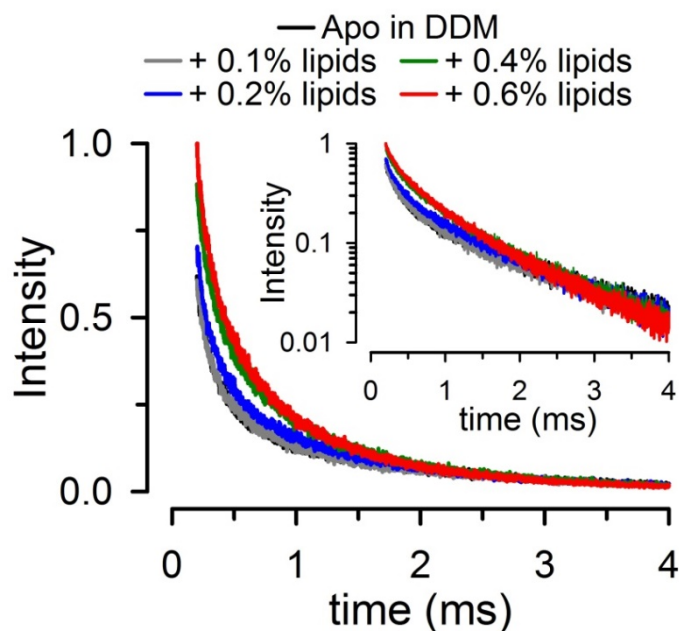

**Supplementary Fig. 7. Conformational changes elicited by addition of lipids to Pgp NT in detergent in the apo state.**

Bodipy FL sensitized emission decays, recorded at 520 nm, from Pgp NT in detergent (DDM; 0.1% n-dodecyl- $\beta$ -D-maltopyranoside) before and after addition of *E. coli* lipids (in %; w/v) to produce mixed DDM/lipid micelles. Pgp NT was studied in the apo state (nucleotide- and drug-free buffer with 1 mM EDTA). The inset displays the same curves in a semi-log scale. Decays were normalized to the emission measured in the presence of 0.6% lipids at 200  $\mu$ s. Traces are representative of at least 3 independent experiments and were obtained at 20°C. Emission was recorded after a 200  $\mu$ s delay from the 337-nm excitation pulse.

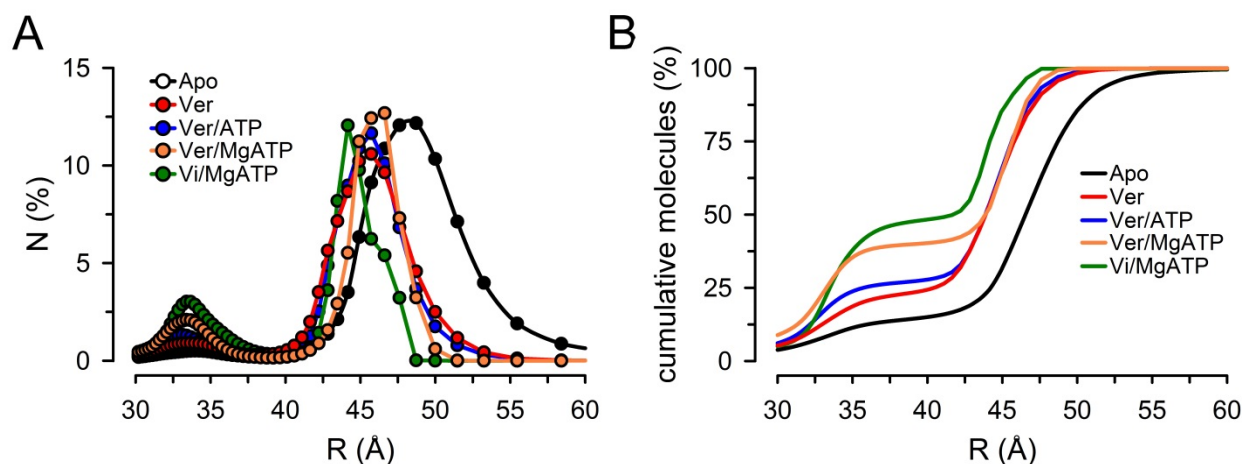

**Supplementary Fig. 8. Distance distributions of Pgp NT in NDSCs under different states during the hydrolysis cycle.** *A*, Distance distributions calculated from LRET sensitized emission intensity decays analyzed by an exponential series method. *N*: % molecules. The symbols denote the calculated average values and are joined by spline lines. *B*, Cumulative number of molecules vs. donor-acceptor pair distance. Data were obtained by cumulative addition of *N* determined by the exponential series method analysis (panel *A*). The percentage of molecules in each conformation in Fig. 5 of the accompanying manuscript was calculated from the fractional intensity contribution of each exponential component divided by the rate of energy transfer ( $k = 1/\tau_{DA} - 1/\tau_D$ ), and was adjusted based on the cumulative number of molecules vs. donor-acceptor pair distance obtained from the exponential series method analysis (panel *B*). Apo: nucleotide- and drug-free buffer with 1 mM EDTA; Ver: + 30  $\mu$ M verapamil; Ver/ATP-bound: + 5 mM NaATP; Ver/MgATP: + 10 mM MgSO<sub>4</sub>; Ver/Vi: + 0.25 mM Vi. Data from Pgp NT in NDs at 37°C were used for all calculations ( $n = 5$ ). See Experimental Procedures for references and additional details.
